# Supplementary material
Source: PubMed Central journal article supplement (PMC7162010)
Supplement: CBDD-94-2023-s003.pdf [file CBDD-94-2023-s003.pdf]

Supplementary Table 1. A flavonoid library

\*Isoflavone;1-3, Isoflavane;4, Flavone;5-10, Flavonol;11-19, Flavanol;20-23, Flavanone;24-28, Flavanonl;29, Prenylflavonoid;30, Chalcone;31-38, unclassified;39-40

| No | Name of compound*                                             | No | Name of compound             |
|----|---------------------------------------------------------------|----|------------------------------|
| 1  | Daidzein                                                      | 21 | (-)-Epigallocatechin gallate |
| 2  | Genistein                                                     | 22 | (-)-Epicatechin              |
| 3  | Genistin                                                      | 23 | (±)-Catechin                 |
| 4  | Glabridin                                                     | 24 | Hesperidin                   |
| 5  | Baicalein                                                     | 25 | Naringenin                   |
| 6  | Diosmin                                                       | 26 | Sakuranetin                  |
| 7  | Diosmetin                                                     | 27 | Naringin                     |
| 8  | Skullcapflavone II                                            | 28 | Poncirin                     |
| 9  | beta-Naphthoflavone                                           | 29 | (±)-Taxifolin hydrate        |
| 10 | 5,7,2',6'-Tetrahydroxyflavone                                 | 30 | Isoxanthohumol               |
| 11 | Herbacetin                                                    | 31 | Isobavachalcone              |
| 12 | Kaempferol                                                    | 32 | 2,2',4'-Trihydroxychalcone   |
| 13 | Kaempferol-3-O-(3,4-O-diacetyl- $\alpha$ -L-rhamnopyranoside) | 33 | Dienestrol                   |
| 14 | Morin                                                         | 34 | Sofalcone                    |
| 15 | Myricetin                                                     | 35 | Rhodamine 6G                 |
| 16 | Fisetin                                                       | 36 | FCLA Free Acid               |
| 17 | Quercitrin                                                    | 37 | Helichrysetin                |
| 18 | Quercetin                                                     | 38 | Cardamonin                   |
| 19 | Quercetin 3- $\beta$ -D-glucoside                             | 39 | Mangiferin                   |
| 20 | (-)-Gallocatechin                                             | 40 | Auraptene                    |
